# Supplementary material
Source: MDPI journal article supplement (https://www.mdpi.com/2076-3417/12/19/10130)
Supplement: s1 [file s1]

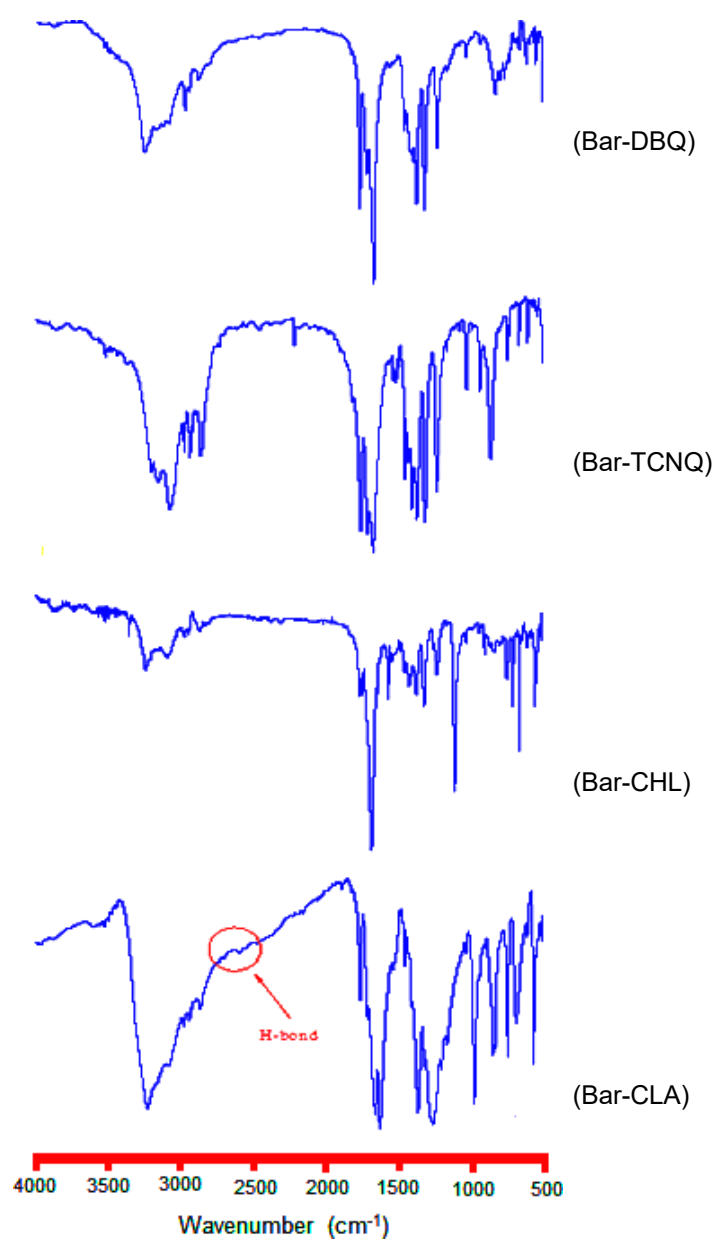

**Figure S1.** The IR spectra of Bar-CT complexes [56].

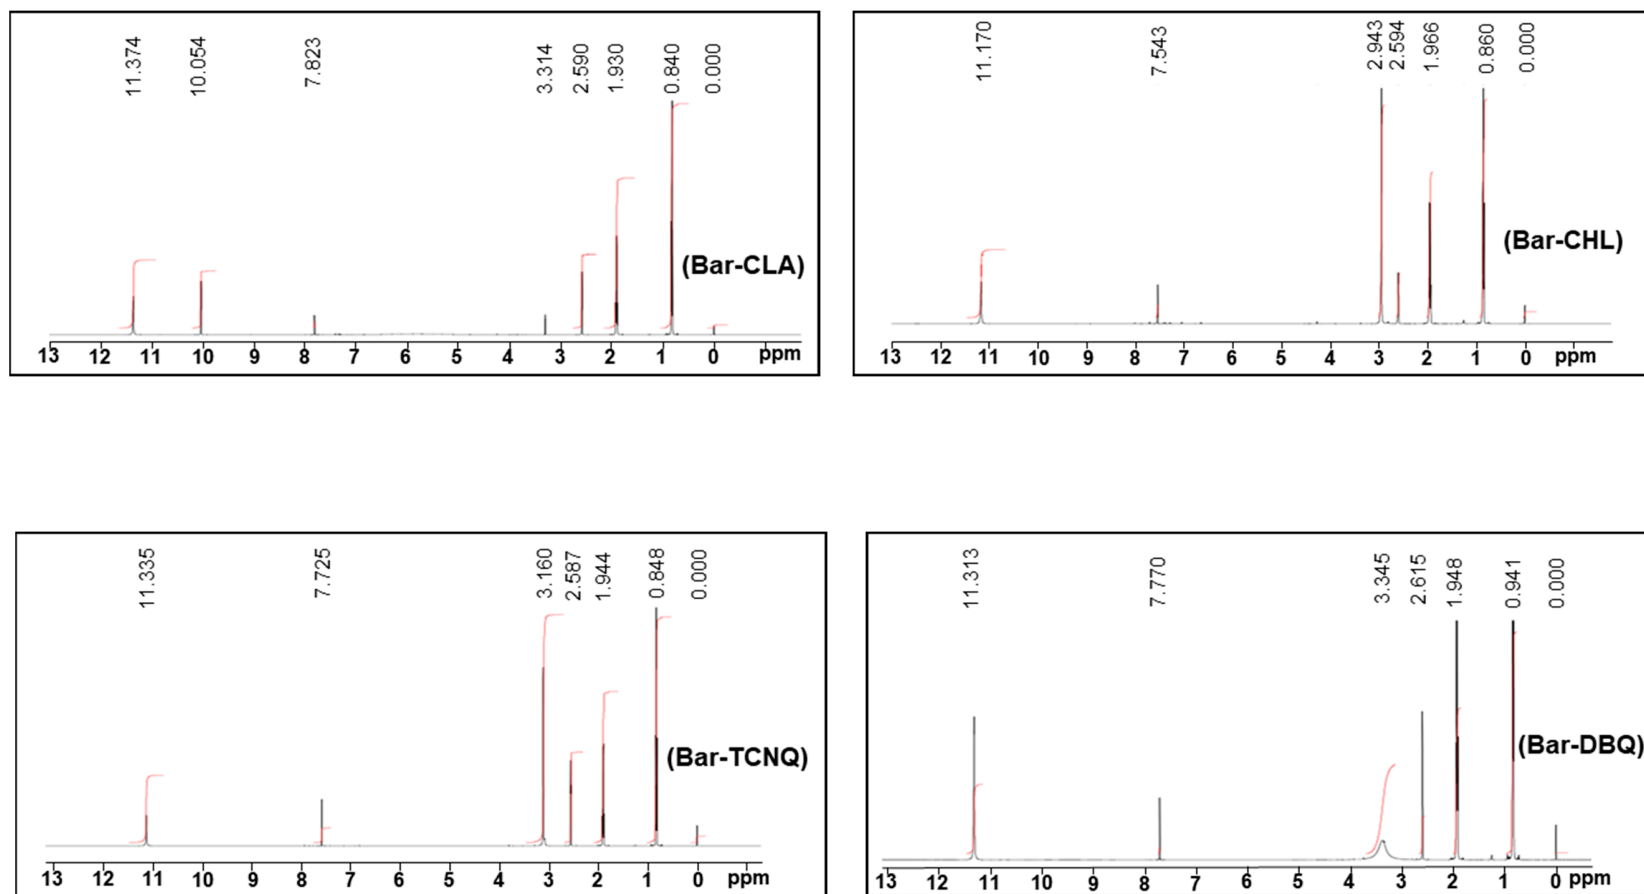

**Figure S2.** The  $^1\text{H}$  NMR spectra of Bar-CT complexes [56].

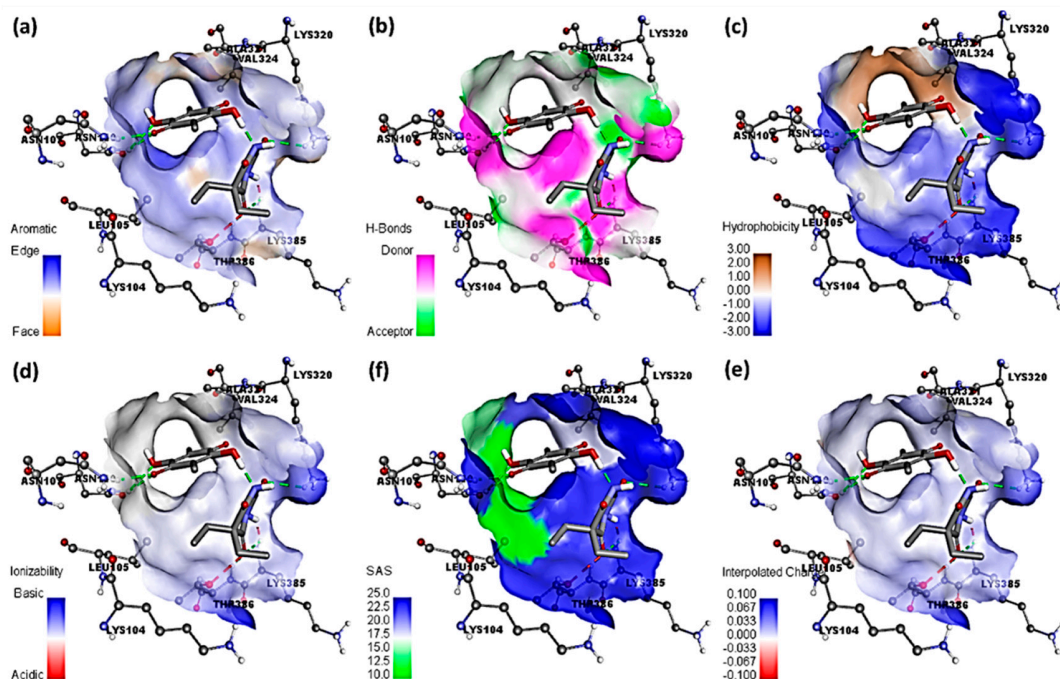

**Figure S3.** The docking results of (Bar-CLA)-serotonin complex. **a:**aromatic surface, **b:** hydrogen binding surface, **c:** hydrophobic surface, **d:** ionizability surface, **e:**solvent accessible surface, and **f:** Interpolated charge.

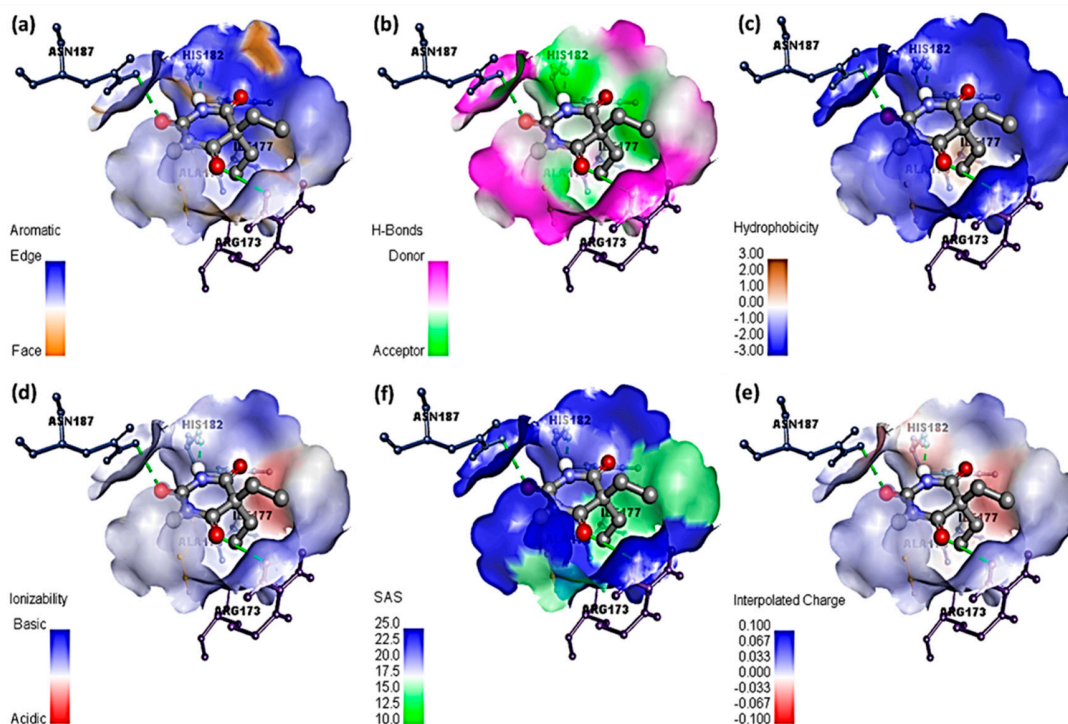

**Figure S4.** The docking results of (Bar)-serotonin complex. **a:**aromatic surface, **b:** hydrogen binding surface, **c:** hydrophobic surface, **d:** ionizability surface, **e:**solvent accessible surface, and **f:** Interpolated charge.

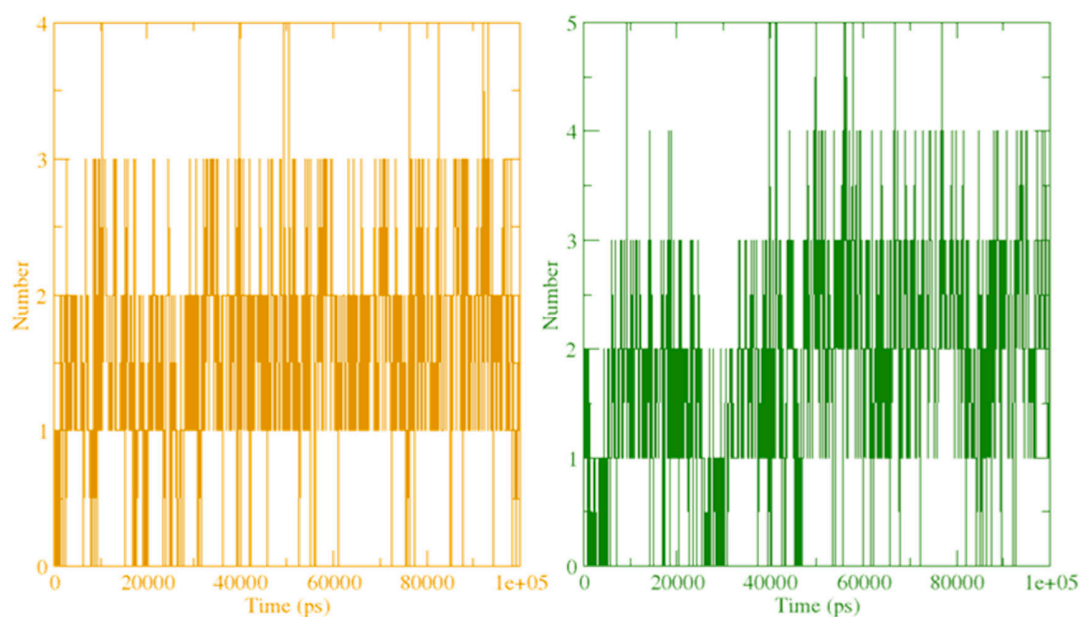

**Figure S5.** Number of average hydrogen bonding interactions between (a) BarScomplex and (b) BarCS complex during 100 ns simulation time.

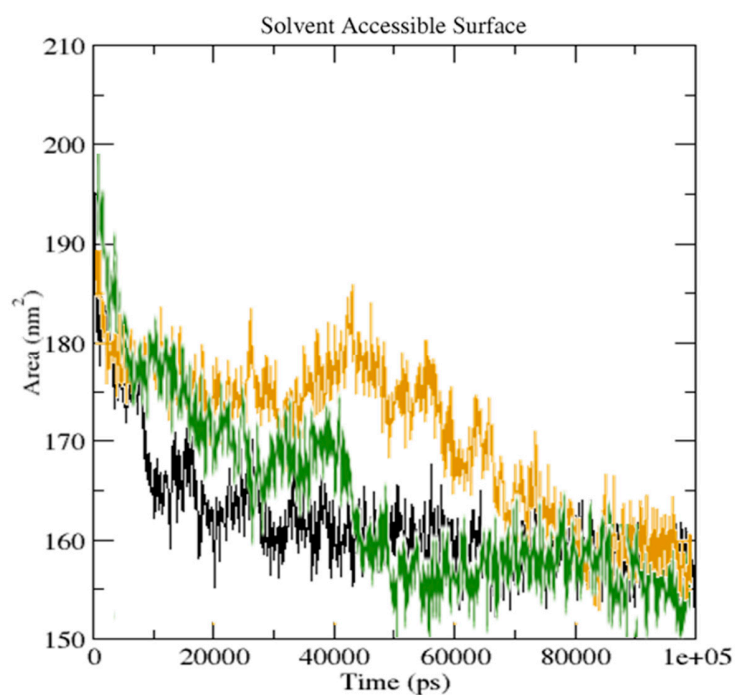

**Figure S6.** Solvent accessible surface area analysis for unbound serotonin receptor (black), BarS complex (orange) and BarCS complex (green) during 100 ns simulation time.

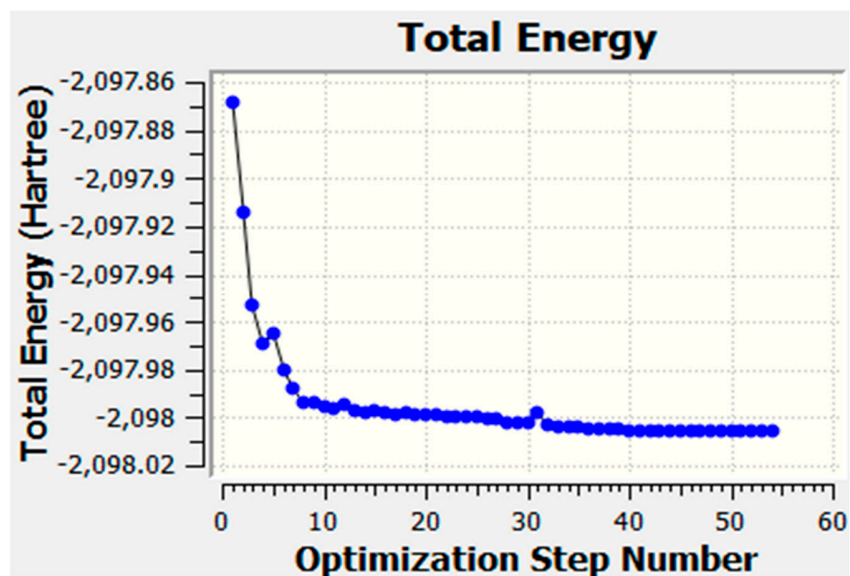

Figure S7. Optimization Steps for (Bar-CLA)(B3LYP/6-311G++).

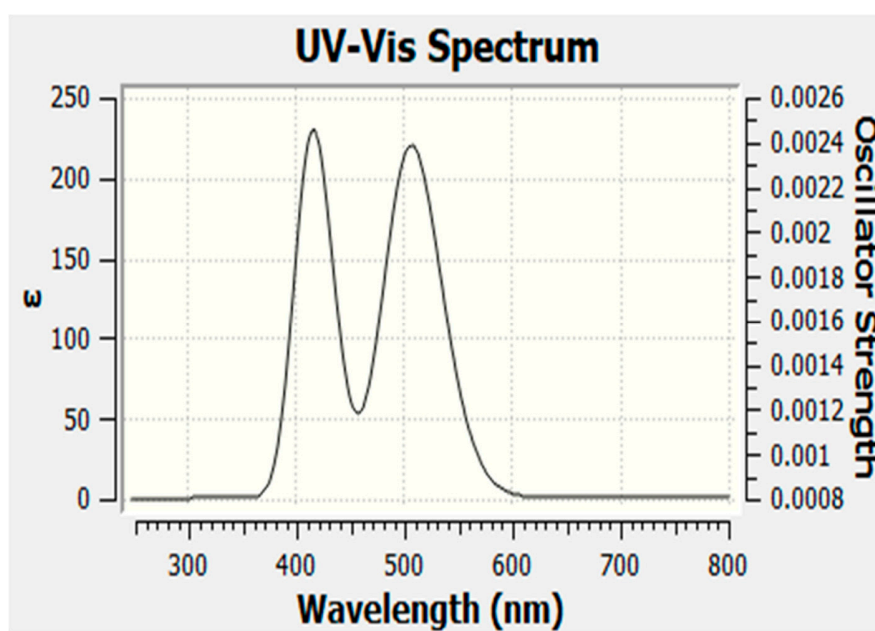

Figure S8. UV-visible spectrum of (Bar-CLA) obtained through TD-DFT calculations.

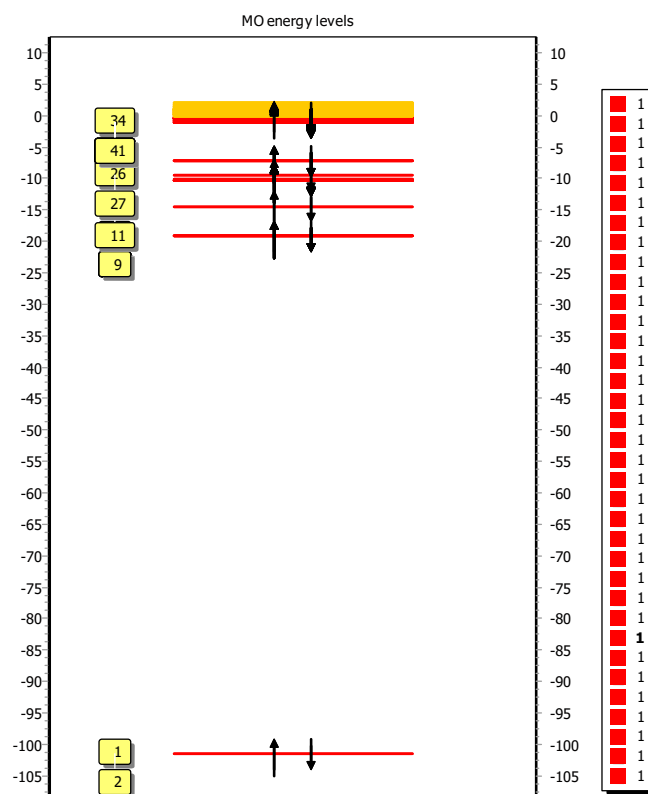

**Figure S9.** MO energy level diagram of the CT complex (Bar-CLA).

**Table S1.** (Bar-CLA)-dopamine interactions results by DS.

| <b>Name</b>               | <b>Distance</b> | <b>Category</b> | <b>Type</b>                |
|---------------------------|-----------------|-----------------|----------------------------|
| ASN107:H - (Bar-CLA):O    | 2.16368         | Hydrogen Bond   | Conventional Hydrogen Bond |
| ASN110:H - (Bar-CLA):O    | 2.23611         | Hydrogen Bond   | Conventional Hydrogen Bond |
| ASN110:H - (Bar-CLA):O    | 2.7051          | Hydrogen Bond   | Conventional Hydrogen Bond |
| LYS320:H - (Bar-CLA):O    | 2.59336         | Hydrogen Bond   | Conventional Hydrogen Bond |
| LYS385:HN - (Bar-CLA):O   | 2.59495         | Hydrogen Bond   | Conventional Hydrogen Bond |
| THR386:HN - (Bar-CLA):O   | 1.96306         | Hydrogen Bond   | Conventional Hydrogen Bond |
| (Bar-CLA):H - (Bar-CLA):N | 1.50033         | Hydrogen Bond   | Conventional Hydrogen Bond |
| (Bar-CLA):Cl - VAL324     | 4.25141         | Hydrophobic     | Alkyl                      |
| (Bar-CLA):C - LYS104      | 4.44711         | Hydrophobic     | Alkyl                      |
| (Bar-CLA):C - LEU105      | 5.45535         | Hydrophobic     | Alkyl                      |
| (Bar-CLA) - ALA321        | 4.19839         | Hydrophobic     | Pi-Alkyl                   |

**Table S2.** Bar-dopamine interactions results by DS.

| <b>Name</b>       | <b>Distance</b> | <b>Category</b> | <b>Type</b>                |
|-------------------|-----------------|-----------------|----------------------------|
| ARG173:H - Bar:O6 | 2.72974         | Hydrogen Bond   | Conventional Hydrogen Bond |
| ASN187:H - Bar:O2 | 2.72666         | Hydrogen Bond   | Conventional Hydrogen Bond |
| UNK1:H - Bar:O    | 2.33497         | Hydrogen Bond   | Conventional Hydrogen Bond |
| ALA176 - Bar:C10  | 4.31947         | Hydrophobic     | Alkyl                      |
| Bar:C10 - ARG173  | 4.11553         | Hydrophobic     | Alkyl                      |
| Bar:C10 - ILE177  | 5.1821          | Hydrophobic     | Alkyl                      |

**Table S3.** The bond lengths of the CT complex (Bar-CLA) obtained through DFT.

| S. No. | (Bar-CLA) (B3LYP/ 6-311G++) |                 |          |                 |
|--------|-----------------------------|-----------------|----------|-----------------|
|        | Atom No.                    | Bond length (Å) | Atom No. | Bond length (Å) |
| 1      | R(1-9)                      | 1.258           | R(11-19) | 1.07            |
| 2      | R(2-10)                     | 1.259           | R(11-20) | 1.07            |
| 3      | R(3-13)                     | 1.258           | R(12-21) | 1.07            |
| 4      | R(4-9)                      | 1.476           | R(12-22) | 1.07            |
| 5      | R(4-13)                     | 1.482           | R(12-23) | 1.07            |
| 6      | R(4-24)                     | 1               | R(26-34) | 1.76            |
| 7      | R(5-10)                     | 1.464           | R(27-35) | 1.76            |
| 8      | R(5-13)                     | 1.476           | R(28-32) | 1.43            |
| 9      | R(5-25)                     | 1               | R(28-38) | 0.96            |
| 10     | R(6-7)                      | 1.54            | R(29-33) | 1.43            |
| 11     | R(6-8)                      | 1.54            | R(29-39) | 0.96            |
| 12     | R(6-9)                      | 1.535           | R(30-36) | 1.258           |
| 13     | R(6-10)                     | 1.528           | R(31-37) | 1.258           |
| 14     | R(7-11)                     | 1.54            | R(32-34) | 1.355           |
| 15     | R(7-14)                     | 1.07            | R(32-37) | 1.54            |
| 16     | R(7-15)                     | 1.07            | R(33-35) | 1.355           |
| 17     | R(8-12)                     | 1.54            | R(33-36) | 1.54            |
| 18     | R(8-16)                     | 1.07            | R(34-36) | 1.54            |
| 19     | R(8-17)                     | 1.07            | R(35-37) | 1.539           |
| 20     | R(11-18)                    | 1.07            | R(4-38)  | 1.5             |



**Table S4.** The bond angles of the CT complex (Bar-CLA) obtained through DFT.

| S. No. | (Bar-CLA) (B3LYP/ 6-311G++) |                |             |                |
|--------|-----------------------------|----------------|-------------|----------------|
|        | Atom No.                    | Bond Angle (Å) | Atom No.    | Bond Angle (Å) |
| 1      | A(1-9-4)                    | 117.7          | A(14-7-15)  | 109.5          |
| 2      | A(1-9-6)                    | 117.7          | A(12-8-16)  | 109.5          |
| 3      | A(2-10-5)                   | 119.8          | A(12-8-17)  | 109.5          |
| 4      | A(2-10-6)                   | 119.8          | A(8-12-21)  | 109.4          |
| 5      | A(3-13-4)                   | 117            | A(8-12-22)  | 109.5          |
| 6      | A(3-13-5)                   | 117            | A(8-12-23)  | 109.5          |
| 7      | A(9-4-13)                   | 113.8          | A(16-8-17)  | 109.5          |
| 8      | A(9-4-24)                   | 107.7          | A(18-11-19) | 109.5          |
| 9      | A(4-9-6)                    | 124.5          | A(18-11-20) | 109.5          |
| 10     | A(9-4-38)                   | 108.7          | A(19-11-20) | 109.4          |
| 11     | A(13-4-24)                  | 107.6          | A(21-12-22) | 109.5          |
| 12     | A(4-13-5)                   | 126            | A(21-12-23) | 109.5          |
| 13     | A(13-4-38)                  | 108.9          | A(22-12-23) | 109.5          |
| 14     | A(24-4-38)                  | 110.1          | A(26-34-32) | 120            |
| 15     | A(10-5-13)                  | 113.3          | A(26-34-36) | 120            |
| 16     | A(10-5-25)                  | 109.1          | A(27-35-33) | 120            |
| 17     | A(5-10-6)                   | 120.3          | A(27-35-37) | 120            |
| 18     | A(13-5-25)                  | 107.6          | A(32-28-38) | 109.4          |
| 19     | A(7-6-8)                    | 109.7          | A(28-32-34) | 120            |
| 20     | A(7-6-9)                    | 108.5          | A(28-32-37) | 120            |
| 21     | A(7-6-10)                   | 109.9          | A(28-38-4)  | 179.9          |
| 22     | A(6-7-11)                   | 109.5          | A(33-29-39) | 109.5          |
| 23     | A(6-7-14)                   | 109.5          | A(29-33-35) | 120            |

|           |            |       |             |     |
|-----------|------------|-------|-------------|-----|
| <b>24</b> | A(6-7-15)  | 109.5 | A(29-33-36) | 120 |
| <b>25</b> | A(8-6-9)   | 109.6 | A(30-36-33) | 120 |
| <b>26</b> | A(8-6-10)  | 108.2 | A(30-36-34) | 120 |
| <b>27</b> | A(6-8-12)  | 109.5 | A(31-37-32) | 120 |
| <b>28</b> | A(6-8-16)  | 109.5 | A(31-37-35) | 120 |
| <b>29</b> | A(6-8-17)  | 109.5 | A(34-32-37) | 120 |
| <b>30</b> | A(9-6-10)  | 110.9 | A(32-34-36) | 120 |
| <b>31</b> | A(11-7-14) | 109.5 | A(32-37-35) | 120 |
| <b>32</b> | A(11-7-15) | 109.5 | A(35-33-36) | 120 |
| <b>33</b> | A(7-11-18) | 109.5 | A(33-35-37) | 120 |
| <b>34</b> | A(7-11-19) | 109.5 | A(33-36-34) | 120 |
| <b>35</b> | A(7-11-20) | 109.5 |             |     |

---

**Table S5.** Mulliken atomic charges of the CT complex (Bar-CLA) atoms.

| S.No. | Synthesized complex     |                         |                         |                         |
|-------|-------------------------|-------------------------|-------------------------|-------------------------|
|       | Mulliken atomic numbers | Mulliken atomic charges | Mulliken atomic numbers | Mulliken atomic charges |
| 1     | 1O                      | -0.39605                | 21H                     | 0.16819                 |
| 2     | 2O                      | -0.4134                 | 22H                     | 0.15527                 |
| 3     | 3O                      | -0.37655                | 23H                     | 0.15026                 |
| 4     | 4N                      | -0.73014                | 24H                     | 0.40593                 |
| 5     | 5N                      | -0.51945                | 25H                     | 0.35518                 |
| 6     | 6C                      | -0.10352                | 26Cl                    | 0.20931                 |
| 7     | 7C                      | -0.22869                | 27Cl                    | 0.21513                 |
| 8     | 8C                      | -0.24093                | 28O                     | -0.59099                |
| 9     | 9C                      | 0.48745                 | 29O                     | -0.56989                |
| 10    | 10C                     | 0.45428                 | 30O                     | -0.40156                |
| 11    | 11C                     | -0.44066                | 31O                     | -0.43624                |
| 12    | 12C                     | -0.417                  | 32C                     | 0.30859                 |
| 13    | 13C                     | 0.56652                 | 33C                     | 0.32137                 |
| 14    | 14H                     | 0.17528                 | 34C                     | -0.34899                |
| 15    | 15H                     | 0.16892                 | 35C                     | -0.33435                |
| 16    | 16H                     | 0.15877                 | 36C                     | 0.34696                 |
| 17    | 17H                     | 0.1732                  | 37C                     | 0.39147                 |
| 18    | 18H                     | 0.15941                 | 38H                     | 0.48295                 |
| 19    | 19H                     | 0.14673                 | 39H                     | 0.39692                 |
| 20    | 20H                     | 0.15035                 |                         |                         |

**Table S6.** Theoretical molecular properties of (Bar-CLA) complex and their constituents.

| Parameters                                  | B3LYP/ 6-311G++ |
|---------------------------------------------|-----------------|
| Minimum SCF energy (a.u.)                   | -2097.881963    |
| Polarizability ( $\alpha$ ) (a.u.)          | 201.790198      |
| Dipole Moment (Debye)                       | 4.931296        |
| Zero point vibrational energy<br>(kcal/mol) | 174.56503       |
| Total thermal energy (kcal/mol)             | 187.763         |
| Electronic spatial extent (a.u.)            | 11030.3027      |
| Frontier MO energies (eV)                   |                 |
| LUMO                                        | -3.9623         |
| HOMO                                        | -6.4029         |
| HOMO-1                                      | -6.9533         |
| Gap (HOMO – LUMO)                           | 2.4406          |
| Gap (HOMO-1 – LUMO)                         | 2.9533          |
